# Supplementary material
Source: Springer Nature journal article supplement (https://www.springermedizin.de/resource/supplementary/12967_2008_342_MOESM2_ESM.pdf/9576260)

A

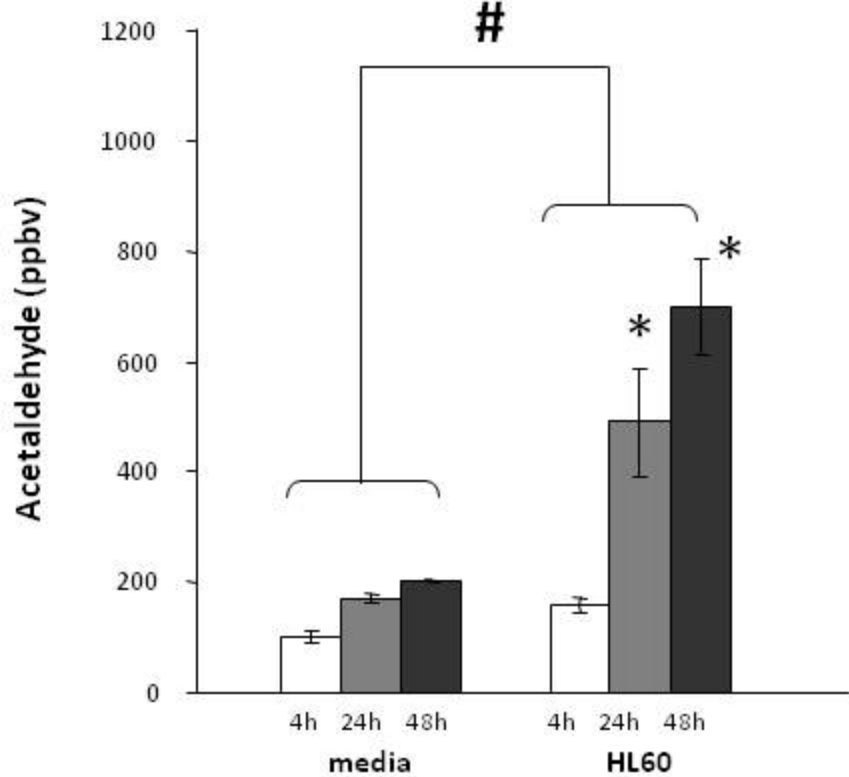

B

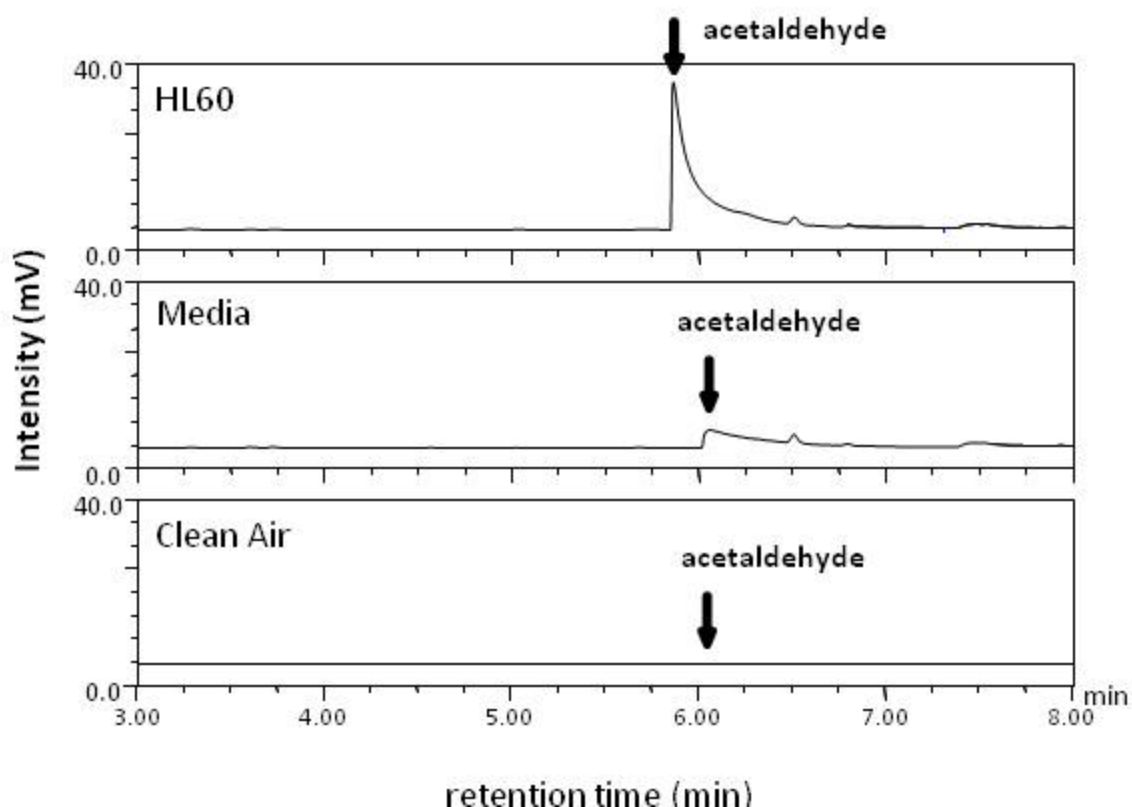

Supplement: MOESM2 [file 9576260]
